# Supplementary material for: Reduced D2/D3 Receptor Binding of Extrastriatal and Striatal Regions in Temporal Lobe Epilepsy
Source: PLoS One. 2015 Nov 6;10(11):e0141098. doi: 10.1371/journal.pone.0141098 (PMC4636381; doi:10.1371/journal.pone.0141098)
Supplement: S3 Dataset — 18F-Fluorodeoxyglucose scores and its standardized uptake value for regions of interest on epileptogenic and non-epileptogenic sides for all patients. The regions of interest are denoted as described in Fig 1. (XLS) [file pone.0141098.s003.xls]

## Sheet: Tabelle1
Patient No.	Lateralization	Body weight [kg]	Administered activity [MBq]	Region.1	Region.2	Region.3	Region.4	Region.5	Region.6	Region.7	Region.8	Region.9	Region.10	Region.11	Region.12	Region.13	Region.14	Region.15	Region.16	Region.17	Region.18	Region.19	Region.20	Region.21	Region.22	Region.23	Region.24	Region.25	Region.26	Region.27	Region.28	Region.29	Region.30	Region.31	Region.32	Region.33	Region.34	Region.35	Region.36	Region.37	Region.38	Region.39	Region.40	Region.41	Region.42	Region.43	Region.44	Region.45	Region.46
1	TLE left	68	188	L13	L13	L2	L2x	L3	L4	L4	L4	L5	L7	L9	L9x	R13	R13	R2	R2x	R3	R4	R4	R4	R5	R7	R9	R9x	L1	L1	L1	L11	L6a	L6a	L6a	L6b	L6b	L6b	L8	L8	L8	R1	R1	R1	R11	R6a	R6a	R6a	R6b	R6b
3	TLE left	72	179	L13	L13	L2	L2x	L3	L4	L4	L4	L5	L7	L9	L9x	R13	R13	R2	R2x	R3	R4	R4	R4	R5	R7	R9	R9x	L1	L1	L1	L11	L6a	L6a	L6a	L6b	L6b	L6b	L8	L8	L8	R1	R1	R1	R11	R6a	R6a	R6a	R6b	R6b
4	TLE left	53	254	L13	L13	L2	L2x	L3	L4	L4	L4	L5	L7	L9	L9x	R13	R13	R2	R2x	R3	R4	R4	R4	R5	R7	R9	R9x	L1	L1	L1	L11	L6a	L6a	L6a	L6b	L6b	L6b	L8	L8	L8	R1	R1	R1	R11	R6a	R6a	R6a	R6b	R6b
8	TLE left	55	295	L13	L13	L2	L2x	L3	L4	L4	L4	L5	L7	L9	L9x	R13	R13	R2	R2x	R3	R4	R4	R4	R5	R7	R9	R9x	L1	L1	L1	L11	L6a	L6a	L6a	L6b	L6b	L6b	L8	L8	L8	R1	R1	R1	R11	R6a	R6a	R6a	R6b	R6b
9	TLE left	118	315	L13	L13	L2	L2x	L3	L4	L4	L4	L5	L7	L9	L9x	R13	R13	R2	R2x	R3	R4	R4	R4	R5	R7	R9	R9x	L1	L1	L1	L11	L6a	L6a	L6a	L6b	L6b	L6b	L8	L8	L8	R1	R1	R1	R11	R6a	R6a	R6a	R6b	R6b
11	TLE left	66	265	L13	L13	L2	L2x	L3	L4	L4	L4	L5	L7	L9	L9x	R13	R13	R2	R2x	R3	R4	R4	R4	R5	R7	R9	R9x	L1	L1	L1	L11	L6a	L6a	L6a	L6b	L6b	L6b	L8	L8	L8	R1	R1	R1	R11	R6a	R6a	R6a	R6b	R6b
14	TLE left	43	287	L13	L13	L2	L2x	L3	L4	L4	L4	L5	L7	L9	L9x	R13	R13	R2	R2x	R3	R4	R4	R4	R5	R7	R9	R9x	L1	L1	L1	L11	L6a	L6a	L6a	L6b	L6b	L6b	L8	L8	L8	R1	R1	R1	R11	R6a	R6a	R6a	R6b	R6b
15	TLE left	100	371	L13	L13	L2	L2x	L3	L4	L4	L4	L5	L7	L9	L9x	R13	R13	R2	R2x	R3	R4	R4	R4	R5	R7	R9	R9x	L1	L1	L1	L11	L6a	L6a	L6a	L6b	L6b	L6b	L8	L8	L8	R1	R1	R1	R11	R6a	R6a	R6a	R6b	R6b
18	TLE left	80	267	L13	L13	L2	L2x	L3	L4	L4	L4	L5	L7	L9	L9x	R13	R13	R2	R2x	R3	R4	R4	R4	R5	R7	R9	R9x	L1	L1	L1	L11	L6a	L6a	L6a	L6b	L6b	L6b	L8	L8	L8	R1	R1	R1	R11	R6a	R6a	R6a	R6b	R6b
19	TLE left	71	282	L13	L13	L2	L2x	L3	L4	L4	L4	L5	L7	L9	L9x	R13	R13	R2	R2x	R3	R4	R4	R4	R5	R7	R9	R9x	L1	L1	L1	L11	L6a	L6a	L6a	L6b	L6b	L6b	L8	L8	L8	R1	R1	R1	R11	R6a	R6a	R6a	R6b	R6b
21	TLE left	55	251	L13	L13	L2	L2x	L3	L4	L4	L4	L5	L7	L9	L9x	R13	R13	R2	R2x	R3	R4	R4	R4	R5	R7	R9	R9x	L1	L1	L1	L11	L6a	L6a	L6a	L6b	L6b	L6b	L8	L8	L8	R1	R1	R1	R11	R6a	R6a	R6a	R6b	R6b
7	TLE right	72	323	R13	R13	R2	R2x	R3	R4	R4	R4	R5	R7	R9	R9x	L13	L13	L2	L2x	L3	L4	L4	L4	L5	L7	L9	L9x	R1	R1	R1	R11	R6a	R6a	R6a	R6b	R6b	R6b	R8	R8	R8	L1	L1	L1	L11	L6a	L6a	L6a	L6b	L6b
12	TLE right	88	287	R13	R13	R2	R2x	R3	R4	R4	R4	R5	R7	R9	R9x	L13	L13	L2	L2x	L3	L4	L4	L4	L5	L7	L9	L9x	R1	R1	R1	R11	R6a	R6a	R6a	R6b	R6b	R6b	R8	R8	R8	L1	L1	L1	L11	L6a	L6a	L6a	L6b	L6b
13	TLE right	120	362	R13	R13	R2	R2x	R3	R4	R4	R4	R5	R7	R9	R9x	L13	L13	L2	L2x	L3	L4	L4	L4	L5	L7	L9	L9x	R1	R1	R1	R11	R6a	R6a	R6a	R6b	R6b	R6b	R8	R8	R8	L1	L1	L1	L11	L6a	L6a	L6a	L6b	L6b
17	TLE right	58	372	R13	R13	R2	R2x	R3	R4	R4	R4	R5	R7	R9	R9x	L13	L13	L2	L2x	L3	L4	L4	L4	L5	L7	L9	L9x	R1	R1	R1	R11	R6a	R6a	R6a	R6b	R6b	R6b	R8	R8	R8	L1	L1	L1	L11	L6a	L6a	L6a	L6b	L6b
20	TLE right	83	302	R13	R13	R2	R2x	R3	R4	R4	R4	R5	R7	R9	R9x	L13	L13	L2	L2x	L3	L4	L4	L4	L5	L7	L9	L9x	R1	R1	R1	R11	R6a	R6a	R6a	R6b	R6b	R6b	R8	R8	R8	L1	L1	L1	L11	L6a	L6a	L6a	L6b	L6b
[truncated: 104 more columns]
